1 Efficient in vivo neuronal genome editing in the mouse brain using nanocapsules containing CRISPR-  
2 Cas9 ribonucleoproteins

3  
4 Jeanette M. Metzger<sup>1,a</sup>, Yuyuan Wang<sup>1,b,c,d</sup>, Samuel S. Neuman<sup>a</sup>, Kathy J. Snow<sup>e</sup>, Stephen A. Murray<sup>e</sup>,  
5 Cathleen M. Lutz<sup>e</sup>, Viktoriya Bondarenko<sup>a</sup>, Jesi Felton<sup>a</sup>, Kirstan Gimse<sup>c,d</sup>, Ruosen Xie<sup>b,c,d</sup>, Yi Zhao<sup>b,c,d</sup>,  
6 Matthew T. Flowers<sup>a</sup>, Heather A. Simmons<sup>a</sup>, Subhojit Roy<sup>f</sup>, Krishanu Saha<sup>c,d</sup>, Jon Levine<sup>a,g</sup>, Marina E.  
7 Emborg<sup>\*,a,h</sup>, Shaoqin Gong<sup>\*,b,c,d</sup>

8  
9 <sup>1</sup>These two authors contributed equally and are listed alphabetically

10  
11 <sup>a</sup> Wisconsin National Primate Research Center, University of Wisconsin-Madison, Madison, WI, 53715

12 <sup>b</sup> Department of Ophthalmology and Visual Sciences, University of Wisconsin-Madison, Madison, WI,  
13 53715

14 <sup>c</sup> Department of Biomedical Engineering, University of Wisconsin-Madison, Madison, WI, 53715

15 <sup>d</sup> Wisconsin Institute for Discovery, University of Wisconsin-Madison, Madison, WI, 53715

16 <sup>e</sup> The Jackson Laboratory, Bar Harbor, ME, 04609

17 <sup>f</sup> Departments of Pathology and Neuroscience, University of California-San Diego, San Diego, CA,  
18 92093

19 <sup>g</sup> Department of Neuroscience, University of Wisconsin-Madison, Madison, WI, 53715

20 <sup>h</sup> Department of Medical Physics, University of Wisconsin-Madison, Madison, WI, 53715

21  
22 \*Corresponding authors: [shaoqingong@wisc.edu](mailto:shaoqingong@wisc.edu); [emborg@wisc.edu](mailto:emborg@wisc.edu)

23  
24 Dr. Shaoqin Gong:  
25 Wisconsin Institute For Discovery, 330 North Orchard Street Room 4166, Madison WI 53715  
26 1-608-316-4311

27  
28 Dr. Marina Emborg:  
29 Wisconsin National Primate Research Center 1220 Capitol Court, Madison WI 53715  
30 1-608-262-9714

31  
32

33 **ABSTRACT**

34

35 Genome editing of somatic cells via clustered regularly interspaced short palindromic repeats (CRISPR)  
36 offers promise for new therapeutics to treat a variety of genetic disorders, including neurological diseases.  
37 However, the dense and complex parenchyma of the brain and the post-mitotic state of neurons make  
38 efficient genome editing challenging. *In vivo* delivery systems for CRISPR-Cas proteins and single guide  
39 RNA (sgRNA) include both viral vectors and non-viral strategies, each presenting different advantages  
40 and disadvantages for clinical application. We developed non-viral and biodegradable PEGylated  
41 nanocapsules (NCs) that deliver preassembled Cas9-sgRNA ribonucleoproteins (RNPs). Here, we show  
42 that the RNP NCs led to robust genome editing in neurons following intracerebral injection into the  
43 mouse striatum. Genome editing was predominantly observed in medium spiny neurons (>80%), with  
44 occasional editing in cholinergic, calretinin, and parvalbumin interneurons. Glial activation was minimal  
45 and was localized along the needle tract. Our results demonstrate that the RNP NCs are capable of safe  
46 and efficient neuronal genome editing *in vivo*.

47

48 **SIGNIFICANCE STATEMENT**

49

50 Modifying the DNA of cells in the brain could present opportunities for new treatments of neurological  
51 diseases. In this report, we describe a nanocapsule system designed to deliver the elements needed to  
52 modify the DNA of brain cells, also known as genome editing. These nanocapsules are created by  
53 chemically encapsulating the genome editing components, such that the nanocapsules are stable when  
54 prepared and biodegradable to release their payload upon entering cells. When injected into the mouse  
55 brain, our research shows that the nanocapsules lead to safe and efficient editing of DNA in neurons.

56

## 57 INTRODUCTION

58  
59 CRISPR-Cas9 *in vivo* editing of somatic cells holds significant promise for treating rare and common  
60 diseases<sup>1,2</sup>. RNA-guided Cas9 systems can quickly and efficiently cleave target DNA in coding or non-  
61 coding areas of the genome with low off-target effects. CRISPR-Cas9 genome editing has been tested in  
62 multiple animal species as a method of generating disease models and as a potential therapy. The  
63 technology has recently moved into clinical trials to treat several pathologies including cancer<sup>3</sup>,  
64 hereditary transthyretin amyloidosis<sup>4</sup>, and an inherited cause of childhood blindness<sup>5</sup>. Building on these  
65 advances, newer technologies capable of safely delivering CRISPR-Cas9 genome editors to the brain and  
66 inducing robust neuron editing could revolutionize the treatment of neurological disorders<sup>6,7</sup>.

67  
68 Efficient genome editing of the neurons in the central nervous system (CNS) presents notable challenges.  
69 The vasculature of the CNS forms the blood brain barrier (BBB), which controls brain homeostasis by  
70 tightly regulating the movement of ions, molecules, and cells between the bloodstream and the brain. For  
71 systemic administration, compounds targeting the CNS need to have specific properties to cross the BBB  
72<sup>8</sup>. High dosages of these compounds may be required that could produce unwanted side effects<sup>9</sup>.  
73 Temporary disruption of the BBB is proposed as an alternative approach for BBB penetration, but this  
74 approach carries unique risks associated with negating the protection of the BBB<sup>9,10</sup>. Intracerebral  
75 injection, albeit invasive, allows for bypassing the BBB by direct delivery into the brain parenchyma.  
76 Regardless of the route or delivery method, once inside the brain, the delivered substance must then  
77 traverse a dense and complex neuropil to access neurons. Particles with smaller sizes and neutral charges  
78 are advantageous for brain editing, as they can diffuse over longer distances in this unique extracellular  
79 matrix<sup>11-13</sup>.

80  
81 Viral or plasmid vectors have been successfully applied for *in vivo* delivery of Cas9 and single guide  
82 RNA (sgRNA) to the brain, most commonly through the use of adeno-associated virus (AAV) vectors<sup>14-</sup>  
83<sup>18</sup>. To deliver genome editing components, AAVs depend on the host transcriptional and translational  
84 machinery of the cell to generate genome editing ribonucleoproteins (RNPs). Further, their genetic DNA  
85 payload is limited by the packaging ability of AAV (~5kb)<sup>19</sup>. These vectors are typically considered to  
86 present relatively low risk for integration into the genome; yet, recent work has demonstrated that AAV  
87 vectors carrying CRISPR components frequently integrate at the site of double strand breaks<sup>20,21</sup>. The  
88 resultant prolonged expression of the Cas9 nuclease may increase the risk for eventual off-target effects  
89<sup>21-23</sup>. Viral vector capsids and accessory proteins may trigger an immune response, impacting efficacy and  
90 biosafety *in vivo*<sup>24</sup>. Antibodies against different AAV serotypes have been identified in the human  
91 population, posing a particular challenge to clinical translation<sup>25</sup>. Cas9 can alternatively be introduced by  
92 nonviral delivery of mRNA, which can be impacted by low RNA stability<sup>23</sup>. Moreover, lentiviral vectors  
93 to deliver Cas9 are genome integrating vectors; thus, they carry some risk of insertional mutagenesis and  
94 genotoxicity<sup>20</sup>. In comparison, delivery of preassembled Cas9 protein/sgRNA RNP avoids genome  
95 integration and leads to transient Cas9 expression in the cell, thereby lowering the risks of deleterious  
96 insertional effects and off-target editing<sup>19,26-28</sup>.

97  
98 The first demonstration of *in vivo* brain editing using Cas9 protein/sgRNA RNP was reported in 2017 via  
99 intracerebral injection of RNPs tagged with multiple nuclear localization signals<sup>29</sup>. Following this  
100 landmark study, a limited number of non-viral vectors for RNP delivery for neuronal editing have been  
101 reported, such as CRISPR-gold<sup>30</sup> and peptide nanocomplexes<sup>31</sup>. We developed a novel RNP nanocapsule  
102 (NC) for RNP delivery in which monomers with different functional moieties bind to the RNP surface  
103 and form a covalently crosslinked, yet degradable, polymeric coating via *in situ* free radical  
104 polymerization<sup>32</sup>. The RNP NCs achieve endosomal escape via imidazole-containing monomers and lead  
105 to release of RNP into cellular cytosol by cleavage of the glutathione-responsive cross-linker. The  
106 versatile surface chemistry of the PEGylated NCs allows for convenient conjugation of various types of  
107 targeting ligands or cell penetrating peptides (CPPs). Furthermore, in contrast to self-assembled

108 nanoparticles, the RNP NCs have outstanding *in vivo* stability before entering the target cells, due to their  
109 covalent nature. The RNP NCs also have a much smaller size (around 35 nm) compared with other types  
110 of self-assembled nanoparticles (typically larger than 100 nm), which may facilitate their diffusion within  
111 the brain. Finally, the RNP NCs also enable a relatively high RNP loading content (~40 wt%). The NC  
112 editing efficiency has been previously demonstrated in murine retinal pigment epithelium tissue and  
113 skeletal muscle<sup>32</sup>. The aim of this study was to assess the application of these uniquely engineered RNP  
114 NCs for neuronal genome editing in the mouse brain.

115

## 116 RESULTS

117

118 The RNP NCs were prepared as previously reported with minor modifications (Fig. 1a)<sup>32</sup>. For  
119 intracerebral injection, we hypothesized that conjugation of a neuron-specific ligand (e.g., rabies virus  
120 glycoprotein-derived peptide, aka RVG), or a CPP (i.e., TAT peptide), can enhance the specificity for  
121 neuron-targeted delivery and/or the cellular uptake of the NCs. To test this hypothesis, acrylate-PEG-  
122 RVG and acrylate-PEG-CPP were first synthesized via a Michael addition reaction between acrylate-  
123 PEG-maleimide and thiolated RVG (or CPP) peptides. Monomers with different functional moieties (i.e.,  
124 positive/negative charges, imidazole groups for endosomal escape, and acrylate-PEG with or without  
125 ligands), as well as the disulfide-containing crosslinker were coated onto the RNP surface with optimized  
126 molar ratios<sup>32</sup>. After coating, free radical polymerization was initiated by the addition of ammonium  
127 persulfate and tetramethylethylenediamine. Acrylate-PEG with or without ligand was added in the last  
128 step to form PEGylated RNP NCs. The hydrodynamic diameters and zeta-potentials of NCs, as  
129 determined by dynamic light scattering (DLS), were approximately 35 nm and 2 mV, respectively, and  
130 were similar across NC formulations (i.e., NC-No Ligand, NC-RVG, and NC-CPP), as shown in Fig. 1b.  
131 NCs with different surface modifications also showed similar morphologies according to transmission  
132 electron microscope (TEM) images (Fig. 1c). The stability of NC was evaluated functionally by loading  
133 the NC with Cas9 and a sgRNA targeting green fluorescent protein (GFP) in a transgenic human  
134 embryonic kidney (HEK 293) cell line. Successful delivery of RNP by NCs results in GFP gene  
135 disruption, thus, the genome-editing efficiencies of NCs stored for different durations were evaluated by  
136 the percentage of GFP-negative cells. NC-No Ligand delivering the RNP targeting the GFP gene was  
137 prepared using sgRNAs purchased from two different companies (i.e., sgRNA 1 and sgRNA 2), and  
138 dispersed in the storage buffer. NCs were stored at different temperatures (i.e., 4°C, -20°C and -80°C),  
139 and gene editing efficiency was studied at designated timepoints. As shown in Figure 1d, NCs were stable  
140 for at least 130 days at -80°C without significant gene editing efficiency change.

141

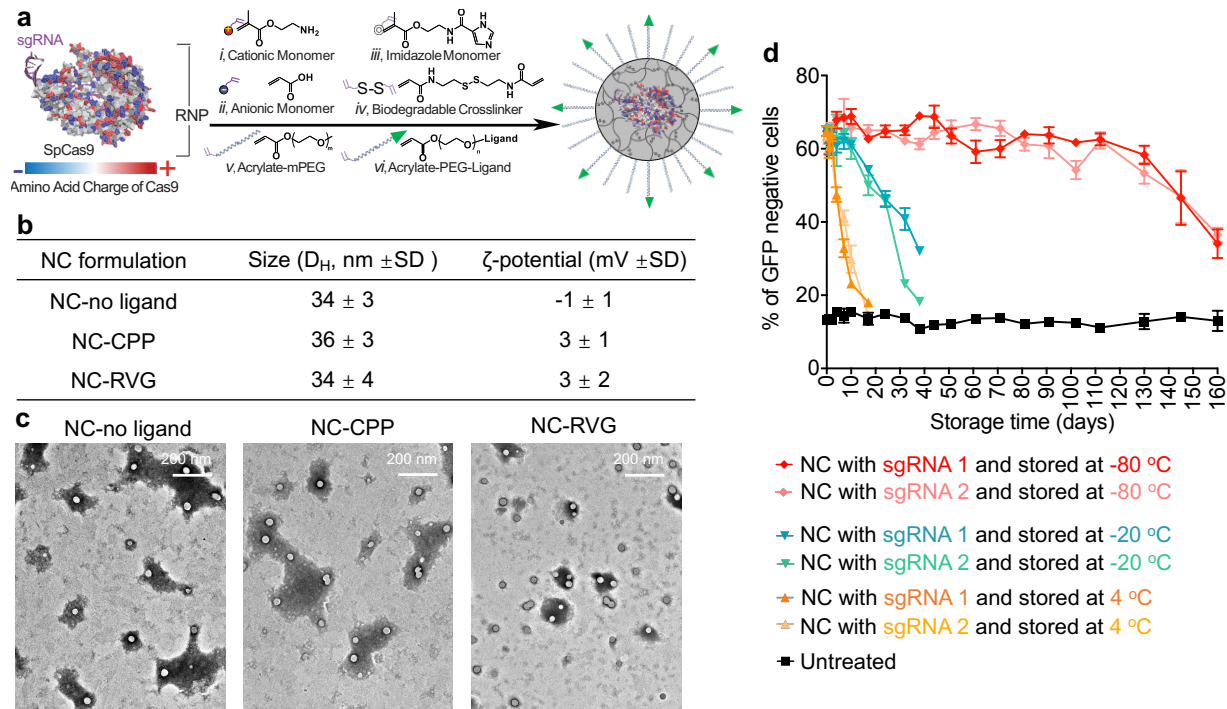

142  
 143 **Figure 1. Synthesis and characterization of the RNP NCs.** a, A schematic illustration for the synthesis  
 144 of RNP-encapsulated NC. b, Summary of the sizes and zeta-potentials of NCs with or without ligand. c,  
 145 TEM images of NC-No Ligand, NC-CPP and NC-RVG. d, RNP delivery of NC after storage at different  
 146 conditions. CPP, cell penetrating peptide; GFP, green fluorescent protein; NC, nanocapsule; RNP,  
 147 ribonucleoprotein; RVG, rabies virus glycoprotein; sgRNA, short guide RNA; TEM, transmission  
 148 electron microscopy.

149  
 150  
 151  
 152 To evaluate the ability of the NCs to deliver RNP and produce *in vivo* neuronal genome editing, NCs  
 153 were stereotactically injected into the striatum of Ai14 mice (Fig. 2b). The Ai14 reporter mouse harbors a  
 154 LoxP-flanked stop cassette containing three SV40 polyA transcriptional terminators, which act to prevent  
 155 the expression of the red fluorescent protein tdTomato. RNP-targeting of sequences within this stop  
 156 cassette can lead to the expression of tdTomato when at least two SV40 polyA blocks are excised;  
 157 therefore, genome editing is detectable via red fluorescence, although the fluorescent tdTomato protein  
 158 underreports the total genome editing outcomes (Fig. 2a)<sup>29,32,33</sup>. Two weeks following stereotactic,  
 159 intrastriatal NC injection, the animals were euthanized by trans-cardiac perfusion, and the brains were  
 160 collected. The coronal sections across the striatum were analyzed for tdTomato positive (i.e., genome-  
 161 edited) cells and co-stained for neuronal (neuronal nuclear protein, NeuN) and astroglial (glial fibrillary  
 162 acidic protein, GFAP) markers (Fig. 2d-g). Regions of interest (ROIs) were defined by the extent of cells  
 163 showing red fluorescence (Fig. 2e). These ROIs were evaluated to determine the neuronal editing  
 164 efficiency and size of the genome-edited brain area (Fig. 2f,g). Based on successful development and  
 165 application of these techniques in a methods development animal cohort (Supp. Fig. 1; Supp. Table 1), a  
 166 larger, independent, second site (The Jackson Laboratory) study was performed to validate the results and  
 167 compare the three formulations, namely, – NC-No Ligand, NC-CPP, and NC-RVG (Fig. 3; Supp. Table  
 168 1). This multi-site approach is a key feature of the National Institutes of Health (NIH) Somatic Cell  
 169 Genome Editing (SCGE) consortium to ensure data reproducibility and scientific rigor.

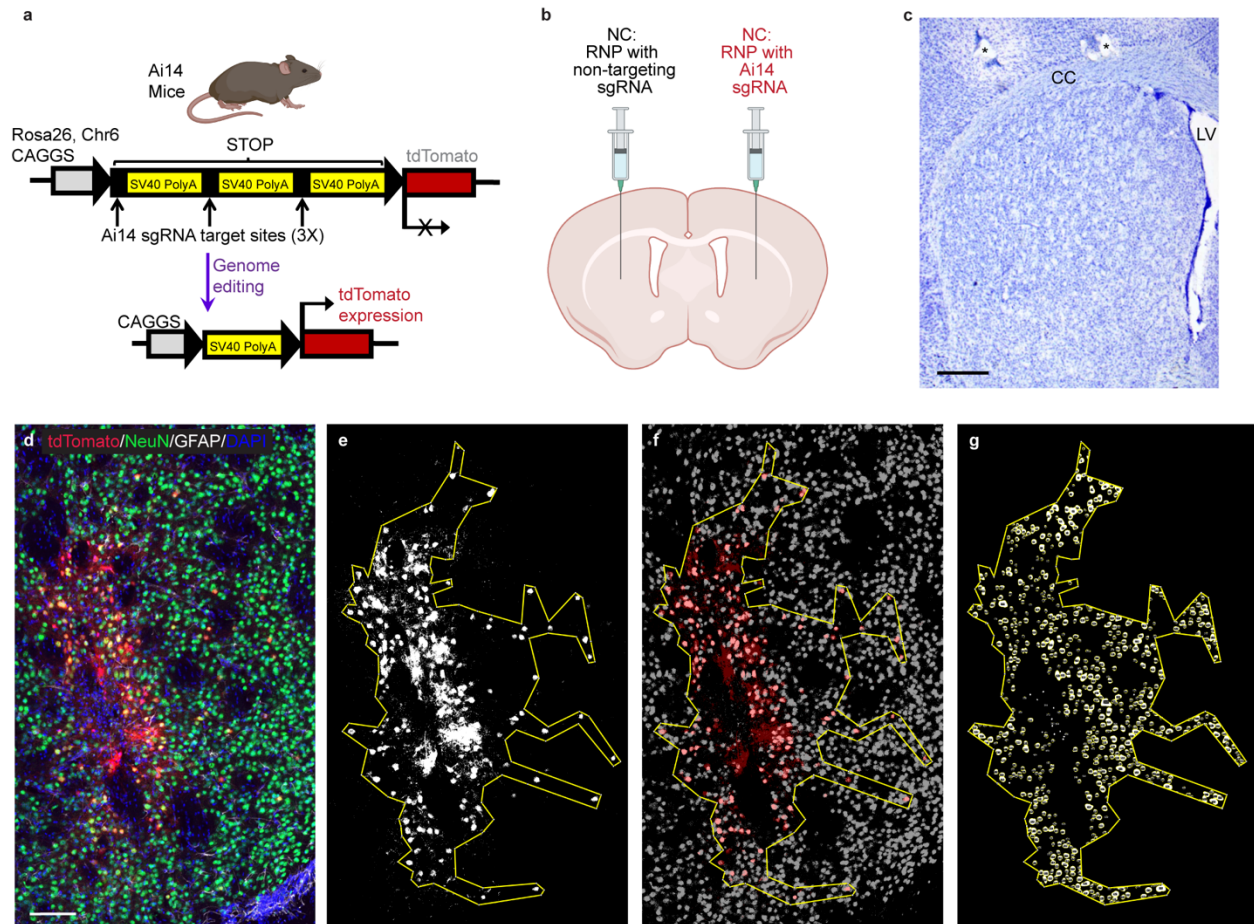

170  
171 **Figure 2. Methods used for analysis of neuronal genome editing.** a, Schematic of the Ai14 mouse  
172 tdTomato locus. CRISPR/Cas9 targeting sites are present in each of the three SV40 polyA sequences in  
173 the STOP cassette. Removal of two of the SV40 polyA cassettes leads to the expression of tdTomato. b,  
174 Schematic of the intrastriatal injection of NCs. c, Nissl-stained coronal mouse section showing normal  
175 striatal anatomy. \*, holes made during tissue processing to identify left hemisphere. CC, corpus callosum.  
176 LV, lateral ventricle. Scale = 500um. d – g, Steps performed for the analysis of edited area size and  
177 percent neuronal editing shown in a single representative coronal brain section (animal J4). d,  
178 Photomicrograph of genome-edited neurons in the mouse striatum showing maximum intensity projection  
179 of three focal planes covering 10 μm. Neurons (NeuN, green) that are genome-edited are tdTomato (red)  
180 expressing. GFAP (astrocytes) = white. DAPI (nuclei) = blue. Scale = 100 μm. e, Using FIJI software, a  
181 binary mask of the tdTomato channel was used to draw a region of interest (ROI) around the edited,  
182 tdTomato+ cells. f, the tdTomato binary mask (red) was then overlaid onto a NeuN signal binary mask  
183 (grey) to manually count genome-edited neurons (tdTomato+ and NeuN+). g, Using StarDist2D object  
184 identification followed by watershed segmentation of the NeuN signal, the NeuN channel was processed  
185 to allow for automated counting of the total number of neurons in the ROI. DAPI, 4',6-diamidino-2-  
186 phenylindole; GFAP, glial fibrillary acidic protein; NeuN, neuronal nuclear protein.  
187  
188  
189

190 Mice treated with NCs loaded with RNP containing the Ai14-targeting sgRNA showed successful  
191 genome editing of striatal neurons (Fig. 3a,b; Supp. Fig. 1; Supp. Table 1). At the site of injection of NCs  
192 with Ai14 sgRNA, abundant genome-edited, neuron-like cells were present, characterized by triangular  
193 cell bodies filled with intense red tdTomato fluorescence and lighter fluorescence in extensions,

194 consistent with axons and dendrites (Fig. 3a,b). A small number of cells suggestive of astrocytes based on  
195 their polygonal shape with multiple processes also expressed tdTomato. To confirm the identity of the  
196 genome-edited cell types, triple immunofluorescence staining with antibodies against tdTomato, the  
197 astrocyte marker GFAP, and the neuron marker NeuN was performed (Fig. 3a,b). Colocalization of nearly  
198 all tdTomato signal with NeuN<sup>+</sup> cells confirmed that the majority of the edited cells were neurons (Fig.  
199 3).  
200

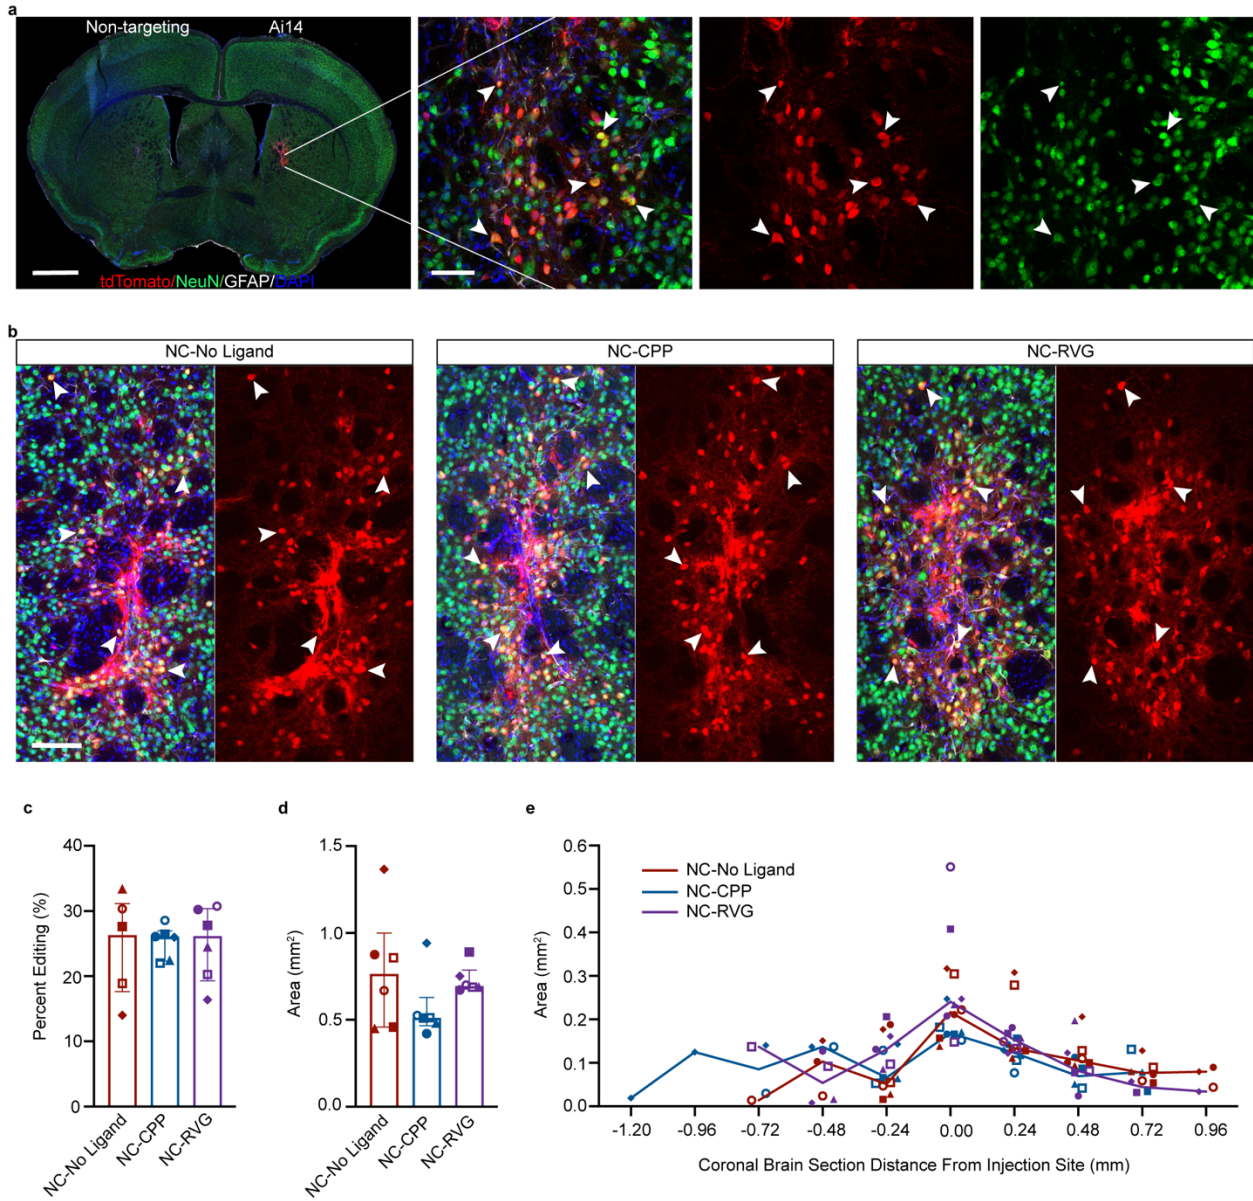

201  
202 **Figure 3. NC delivery of CRISPR RNP produces efficient *in vivo* neuronal genome editing in the**  
203 **striatum of Ai14 mice.** a, Coronal mouse brain section (scale = 1000  $\mu$ m) and high magnification image  
204 (scale = 50  $\mu$ m) of neuronal genome editing following NC injection (animal J11). Co-labeling (yellow;  
205 white arrowheads) of the neuronal marker NeuN (green) and tdTomato (red) indicates genome-edited  
206 neurons. b, Genome-edited neurons (yellow; white arrowheads) in the striatum of representative animals  
207 from each of the NC treatment groups (NC-No Ligand animal J12; NC-CPP animal J18; NC-RVG animal  
208 J5; Supp. Table 1). Scale bar = 100  $\mu$ m. c, Percentage of neurons in the edited area expressing tdTomato  
209 in each NC treatment group. d, Sum of edited area size (region of interest area) across all coronal slices in

210 each NC treatment group. e, Line graph of median edited area size for each treatment group at given  
211 distances rostral and caudal to the injection site. c and d, Graphs show median and interquartile range.  
212 Differences between groups were not statistically significant. c – e, Each animal is shown with a unique  
213 color and symbol. Photomicrographs show maximum intensity projection of three focal planes covering  
214 10  $\mu\text{m}$ . Individual channels were adjusted for brightness as needed (Supp. Table 4). CPP, cell penetrating  
215 peptide; DAPI, 4',6-diamidino-2-phenylindole; GFAP, glial fibrillary acidic protein; NC, nanocapsule;  
216 NeuN, neuronal nuclear protein; RVG, rabies virus glycoprotein.

217  
218  
219  
220 Quantification of the neuronal editing efficiency, or the percentage of neurons (NeuN+ cells) that were  
221 genome-edited (tdTomato+ cells), indicated similar genome-editing capability across all three NC  
222 formulation groups, with  $26.3\% \pm 9.3\%$  in the NC-No Ligand group,  $26.0\% \pm 3.0\%$  in the NC-CPP  
223 group, and  $26.2\% \pm 8.3\%$  in the NC-RVG group ( $H = 0.035$ ;  $df = 2$ ;  $p = 0.990$ ; Fig. 3c). The total  
224 genome-edited brain area, defined as the sum of the ROI areas across all analyzed coronal sections, was  
225  $0.763 \text{ mm}^2 \pm 0.360$  in the NC-No Ligand group,  $0.512 \text{ mm}^2 \pm 0.032$  in the NC-CPP group, and  $0.695$   
226  $\text{mm}^2 \pm 0.051$  in the NC-RVG (Fig. 3d). Differences between the three NC formulation groups were not  
227 statistically significant ( $H = 2.889$ ;  $df = 2$ ;  $p = 0.248$ ). Rostrocaudal spread of genome-editing covered a  
228 range of approximately 1.44 mm in the NC-No Ligand and NC-CPP groups and 1.20 mm in the NC-RVG  
229 group (Fig. 3e). Comparison between cohorts demonstrated a relationship between injected volume of  
230 NCs and edited area. The edited area was significantly larger in the methods development animals  
231 receiving the 1.5  $\mu\text{l}$  injections ( $1.474 \text{ mm}^2 \pm 0.517$ ) compared to the definitive study that were injected  
232 with 1  $\mu\text{l}$  ( $0.680 \text{ mm}^2 \pm 0.319$ ;  $U = 11$ ;  $n_1 = 7$ ;  $n_2 = 18$ ;  $p = 0.0008$ ;  $r = 0.629$ ) when comparing animals in  
233 all treatment groups of these cohorts. This effect remained statistically significant when a potential outlier  
234 (Supp. Table 1 UW3 with a total ROI size of  $7.399 \text{ mm}^2$ ) was removed from the 1.5  $\mu\text{l}$  injected animal  
235 dataset ( $1.367 \text{ mm}^2 \pm 0.510$ ;  $U = 11$ ;  $n_1 = 6$ ;  $n_2 = 18$ ;  $p = 0.0025$ ;  $r = 0.585$ ).

236  
237 The majority of the edited striatal neurons were medium spiny neurons identified by co-labeling of  
238 tdTomato and dopamine- and cAMP-regulated phosphoprotein 32 kDa (DARPP32) (Fig. 4a-c, g; Supp.  
239 Fig. 2). DARPP32+ neurons accounted for approximately  $80.8\% \pm 12.2\%$  of all tdTomato+ neurons  
240 across all NC treatment groups, without significant differences between groups (NC-No Ligand  $84.0\% \pm$   
241  $14.4$ ; NC-CPP  $79.7\% \pm 17.6\%$ ; NC-RVG  $79.2\% \pm 8.8$ ;  $H = 1.867$ ;  $df = 2$ ;  $p = 0.439$ ; Fig. 4g).  
242 Occasionally, other edited neuronal subtypes were observed, such as cholinergic (choline  
243 acetyltransferase, ChAT+), parvalbumin+, and calretinin+ neurons (Fig. 4; Supp. Figs. 2 & 3).

244  
245



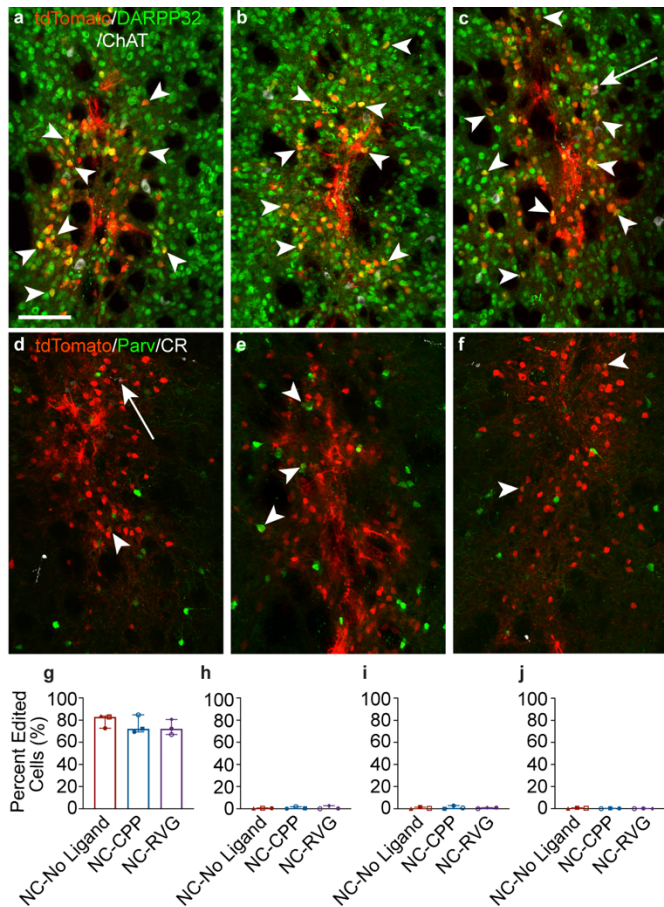

246  
247 **Figure 4. Striatal genome editing following RNP NC delivery is observed primarily in medium**  
248 **spiny neurons.** a – c, Genome-edited neurons in the mouse striatum (tdTomato+; red) are primarily  
249 medium spiny neurons, as indicated by DARPP32 (green) co-labeling (white arrowheads). A small  
250 number choline acetyl transferase (ChAT)+ (white) neurons are genome-edited (white arrows). This  
251 pattern was similar across NC treatment groups (a, NC-No Ligand animal J9; b, NC-CPP animal J17;  
252 NC-RVG animal J5; Supp. Table 1). d – f, Genome-edited parvalbumin (Parv+; white arrowheads) and  
253 calretinin (CR+; white arrows) neurons were occasionally observed (a, NC-No Ligand animal J8; b, NC-  
254 CPP animal J13; NC-RVG animal J4; Supp. Table 1). a – f, scale = 100  $\mu$ m. Photomicrographs show  
255 maximum intensity projection of three focal planes covering 10  $\mu$ m. Individual channels were adjusted  
256 for brightness as needed (Supp. Table 4). Percentage of tdTomato+ neurons that co-labeled for DARPP32  
257 (g), ChAT (h), parvalbumin (i), or calretinin (j) across treatment groups. Graphs shows median and  
258 interquartile range. Differences between groups were not statistically significant. Each animal is shown  
259 with a unique color and symbol (Supp. Table 1). CPP, cell penetrating peptide; DAPI, 4',6-diamidino-2-  
260 phenylindole; DARPP32, dopamine- and cyclic-AMP-regulated phosphoprotein of molecular weight 32  
261 kDa; NC, nanocapsule; RNP, ribonucleoprotein; RVG, rabies virus glycoprotein.

262  
263  
264

265 The host immune reaction to the RNP NC treatment was assessed in hematoxylin and eosin (HE)-labeled  
266 brain sections by a board-certified veterinary pathologist blinded to treatment groups (Fig. 5a-c).  
267 Analyses of the three treatment groups - NC-No Ligand with RNP containing Ai14 sgRNA, NC-No  
268 Ligand with RNP containing non-targeting sgRNA, and uninjected control - did not detect significant  
269 pathology. Small areas of increased cellularity were found in the cortex and striatum of hemispheres  
270 injected with both non-targeting sgRNA NCs and Ai14 sgRNA NCs in coronal tissue samples, consistent

271 with the locations of the injections in the striatum and mechanical passage of the needle (needle tract)  
272 through the cortex.  
273

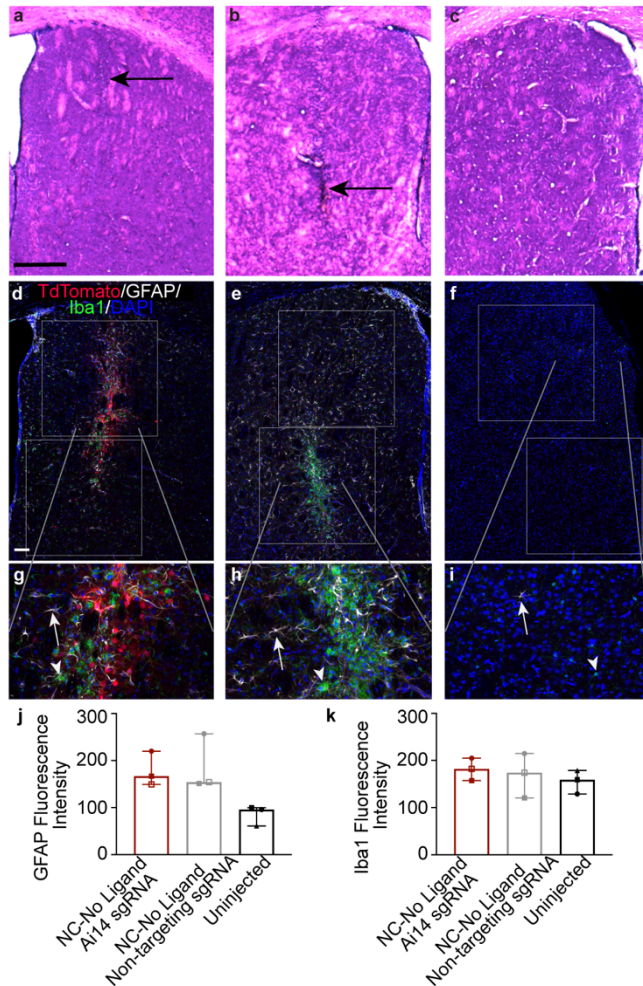

274 **Figure 5. NC injection is not associated with a significant inflammatory response.** a – c, Hematoxylin  
275 and eosin (HE) stained mouse brain tissue at the injection site in the striatum showing linear focal areas of  
276 increased cellularity (black arrows) in each of the treatment groups (a, NC-No Ligand RNP with non-  
277 targeting sgRNA [animal J7 left hemisphere]; b, NC-No Ligand RNP with Ai14 sgRNA [animal J7 right  
278 hemisphere]; Uninjected hemisphere [animal UW8]; Supp. Table 1). Scale bar = 500  $\mu$ m. d – i,  
279 Fluorescence labeling in striatal tissue (same animals as a – c) of tdTomato (red), the astrocyte marker  
280 GFAP (white), the microglial marker Iba1 (green), and the nuclear marker DAPI (blue). White boxes  
281 show the regions of interest (ROIs) drawn for analysis of mean fluorescence intensity. The gray lines  
282 indicate where in the low magnification (d – f, scale = 100  $\mu$ m) image each high magnification image (g –  
283 i, scale = 100  $\mu$ m) is found. White arrows = astrocyte. White arrowheads = microglia. j and k, mean  
284 fluorescence intensity of (j) GFAP and (k) Iba1 expression. Graphs show group median and interquartile  
285 range. No significant differences were found between groups. Individual channels were adjusted for  
286 brightness as needed (Supp. Table 4). DAPI, 4',6-diamidino-2-phenylindole; GFAP, glial fibrillary acidic  
287 protein; Iba1, ionized calcium binding adaptor molecule 1; NC, nanocapsule.  
288  
289  
290  
291

292 To characterize the discrete cellularity observed with HE, coronal brain sections were immunolabeled  
293 against the astrocyte marker GFAP and the microglial marker ionized calcium binding adaptor molecule 1  
294 (Iba1). In all hemispheres, GFAP<sup>+</sup> and Iba1<sup>+</sup> cells were present to varying degrees (Fig. 5d-i). In the  
295 striatum of uninjected hemispheres, GFAP<sup>+</sup> cells were minimal, reflecting resident astroglia. Scattered  
296 Iba1<sup>+</sup> cells indicated the presence of resting microglia typified by highly ramified small, circular cell  
297 bodies extending multiple thin and branching processes. In all injected hemispheres, astrocytes and  
298 microglia appeared mildly to moderately more abundant than in the uninjected hemispheres. Iba1  
299 immunolabeling was increased in small areas similar to the regions of increased cellularity observed in  
300 HE, following the needle track. The Iba1<sup>+</sup> microglia in these foci displayed a more amoeboid, activated  
301 phenotype, appearing larger and with fewer extended processes. Despite the mild increases in visible  
302 GFAP immunolabeling and focal areas of increased Iba1 immunolabeling in the injected hemispheres,  
303 quantification of mean fluorescence intensity in striatum of these animals did not show statistically  
304 significant differences between treatment groups (GFAP: Ai14 sgRNA  $166.9 \pm 35.4$ , non-targeting  
305 sgRNA  $154.3 \pm 52.8$ , uninjected  $95.8 \pm 19.3$ ;  $H = 5.422$ ,  $df = 2$ ,  $p = 0.0714$ ; Iba1: Ai14 sgRNA  $182.4 \pm$   
306  $23.8$ , non-targeting sgRNA  $174.2 \pm 47.0$ , uninjected  $159.1 \pm 24.9$ ,  $H = 0.8$ ,  $df = 2$ ,  $p = 0.7214$ ; Fig. 5j, k).  
307 The triple-immunolabeling also provided further confirmation of the preferential targeting of the NCs to  
308 neurons, as there was very little co-localization of tdTomato with GFAP or Iba1.

## 309 310 DISCUSSION

311  
312 Our results demonstrate successful *in vivo* genome editing in the brain following delivery of CRISPR  
313 RNP by our uniquely engineered biodegradable RNP NCs. NCs preferentially targeted neurons, with  
314 minimal editing in glial cells. Neuronal DNA editing was efficiently produced by the NC-delivered RNP,  
315 with about 26% of neurons in the target area expressing tdTomato. It is important to note that expression  
316 of the tdTomato protein in the Ai14 mouse model significantly underreports the actual genome editing  
317 efficiency. The Ai14 sgRNA has three target sites in the stop cassette and can produce edits such as small  
318 indels or a deletion of only a single stop sequence repeat, neither of which activate tdTomato expression.  
319 It has been estimated that only 34% to 40% of edited cells are expected to produce tdTomato<sup>29</sup>, indicating  
320 that greater than 60% of neurons are likely edited in the present study.

321  
322 The genome-edited cells were largely DARPP32<sup>+</sup>, post-mitotic, medium spiny neurons, a gamma-  
323 aminobutyric acid (GABA)-ergic neuron population that comprises 95% of the neurons in the striatum<sup>34</sup>.  
324 Co-labeling of tdTomato with ChAT, parvalbumin, and calretinin confirmed the capability of NCs to  
325 produce editing across multiple neuronal phenotypes. The low incidence of genome editing in  
326 cholinergic, parvalbumin, and calretinin neurons reflects the low number of these interneuron subtypes in  
327 the rodent striatum, estimated to be 0.5-2%<sup>35,36</sup>, 0.7%<sup>36</sup>, and 0.5%<sup>36</sup>, respectively.

328  
329 These results and previously demonstrated NC-induced genome editing in HEK 293 cell culture, murine  
330 retinal pigmented epithelium (RPE), and murine muscle cells<sup>32</sup> showcase the utility of this CRISPR RNP  
331 delivery method across *in vitro* and *in vivo* applications. These NCs are particularly desirable for  
332 intracerebral delivery of RNP to neurons for several reasons. First, the small size of NCs permits them to  
333 move through the brain parenchyma and deliver cargo to murine striatal neurons<sup>37,38</sup>. The significant  
334 increase in total edited brain area in the animals that received an injection volume of 1.5  $\mu$ l compared to  
335 the animals that received 1  $\mu$ l in this study is consistent with increased volume contributing to the spread  
336 of the NCs in brain tissue. This finding suggests that the injected volume can be adjusted as needed for  
337 local administration aiming to target specific brain structures and minimize concerns of editing in non-  
338 targeted brain areas, especially if combined with real time-intraoperative MRI targeting<sup>39</sup>. A larger  
339 injection volume could be paired with techniques such as convection enhanced delivery<sup>40</sup> to increase NC  
340 distribution to generate a greater edited area. Second, the NC surface is highly PEGylated, which  
341 efficiently reduces surface charge and hydrophobicity, enabling fast diffusion within the brain  
342 extracellular matrix<sup>37,41</sup>. Lastly, the NC surface can be easily modified with targeting ligands (e.g., RVG

343 peptide) or CPP, which can potentially enhance the editing efficiency of the specific cell type being  
344 targeted. Interestingly, the addition of either CPP or RVG to the NC in the present study did not  
345 significantly alter the neuronal editing efficiency or size of the edited brain area. It is currently unclear  
346 why differences were not observed in the animal groups treated by different NC formulations. One  
347 potential explanation is that the targeting ligand type or molar ratio may need to be optimized to edit a  
348 greater number of neurons or additional neuron types. In previous work with these NCs, addition of the  
349 RPE targeting ligand all-trans retinoic acid (ATRA) produced significantly increased *in vivo* RPE editing  
350 relative to undecorated NCs<sup>32</sup>, illustrating the utility of target ligand decoration on these NCs for specific  
351 cell types.

352  
353 Several vehicles and methods for delivering CRISPR genome editors to the brain have been developed  
354 and evaluated. AAV vectors have been directly injected into numerous brain regions to edit neuronal  
355 proteins<sup>42-46</sup>, including in rodent models of Huntington's disease<sup>47,48</sup> and Alzheimer's disease<sup>49</sup>.  
356 Intracerebroventricular (ICV) delivery of AAV carrying CRISPR has been explored to maximize the area  
357 of genome editing in the brain due to distribution in the cerebrospinal fluid (CSF)<sup>16,17</sup>. A recent study  
358 utilizing ICV delivery of AAVs showed knockdown of NeuN in multiple CNS regions<sup>16</sup>. The degree of  
359 NeuN knockdown was noted as variable across the brain and spinal cord, probably due to limited  
360 penetration across the brain parenchyma from the cerebroventricular system. Furthermore, viral vector  
361 delivery of CRISPR gene editing components is subject to the limitations described in the introduction,  
362 including potential immune response. A gold nanoparticle-based, cationic polymer-coated nanocarrier,  
363 i.e., CRISPR-Gold has also been used to produce genome-editing in the brain following injection into the  
364 striatum or hippocampus<sup>30</sup>. The CRISPR-Gold Cas9 delivery method is well suited for editing multiple  
365 cell types in the brain, particularly glial cells, as it seems to preferentially edit resident brain astroglia  
366 (approx. 60% of total edited cells) and microglia (approx. 25%) compared to neurons (approx. 15%) in  
367 the Ai9 mouse striatum. RNP delivery into the striatum or midbrain by nanocomplexes formed by an  
368 R7L10 peptide<sup>31</sup> has been shown to produce neuronal editing. The size of the edited brain area was not  
369 reported for this study, but R7L10 nanocomplexes are reported to have a larger size (approx. 100 nm) and  
370 positive charge (around 10 mV) which might limit their diffusion capability and, therefore, they may  
371 produce a small edited brain area.

372  
373 NC administration and genome-editing were well tolerated by the animals in the current study and no  
374 appreciable immune response in the brain was identified. Injection of NC-encapsulated RNP carrying  
375 either Ai14 targeting or non-targeting sgRNA induced minimal increased cellularity in the brain  
376 parenchyma along the needle tract two weeks post NC delivery. Immunolabeling of astrocytes and  
377 microglia did not show a statistically significant difference in the mean fluorescence intensity of these  
378 glial markers between NC-injected and uninjected hemispheres. A mild to moderate increase in gliosis is  
379 typical following insertion of a needle into the brain and is observed following saline injection<sup>50</sup>.  
380 Assessment of inflammation at an earlier timepoint, e.g. 7 days post-injection instead of 14 days, may  
381 have detected a greater immune response as astrogliosis resolves over time<sup>50</sup>.

382  
383 The RNP NCs produced robust *in vivo* neuronal editing, independently validated in separate experimental  
384 cohorts. The experiments produced consistent results while taking place at two different institutions (i.e.,  
385 UW-Madison and The Jackson Laboratory) with separate surgical teams, imaging tools, and raters for  
386 ROI drawing and cell counting. The repeated demonstration of efficient editing of neurons in the brain,  
387 combined with previous results of *in vivo* editing in additional tissue types<sup>32</sup>, showcases the effectiveness  
388 and versatility of the NCs as a CRISPR RNP delivery platform. The evaluation of the NCs at multiple  
389 facilities was made possible by the notable stability of these NCs, which will be critical for biomedical  
390 applications of this technology. In proper storage buffer (i.e., 20 mM HEPES-NaOH pH 7.5, 150 mM  
391 NaCl, 10 % glycerol), the NC was stable for 130 days at -80°C, indicating NC is suitable for long-term  
392 storage with good gene editing efficiency preserved.

393

394 Overall, these data provide important proof of principle of the efficacy and safety of the NCs in the  
395 mammalian brain. Experiments thus far have focused on the Ai14 mouse model, which is not disease  
396 relevant. An important next step for preclinical testing of these NCs will be to demonstrate editing  
397 efficiency and safety of a therapeutically relevant target in a nonhuman primate model. TdTomato-  
398 positive neurons were indistinguishable with respect to morphology from unedited cells, indicating  
399 healthy axons and dendrites and active, intact transcription and translational processes within the edited  
400 cells. While we did not perform functional studies on the edited mice or brain slices, we did not see any  
401 gross behavioral changes in the treated mice within the 2-3 week timescale of the experiments. These  
402 results are consistent with healthy function of the retinal and muscle tissue following injection of NCs in  
403 prior studies<sup>32</sup>, and we expect any potential adverse effects in the edited neurons to be low and evaluated  
404 in future studies. In addition, scaling up the production of the NCs for administration to the larger animals  
405 will be needed. These future studies are warranted in order to progress toward clinical translation of the  
406 biodegradable NCs as a treatment for neurological diseases.

407

## 408 **METHODS**

409

### 410 *Materials*

411 Acrylic acid (AA), *N,N,N',N'*-tetramethylethylenediamine (TEMED), 1-vinylimidazole (VI) and  
412 ammonium persulfate (APS), and tris(2-carboxyethyl)phosphine (TCEP) were purchased from Thermo  
413 Fisher Scientific. Acrylate-mPEG (Ac-mPEG, 2 kDa) and acrylate-PEG-maleimide (Ac-PEG-Mal, 2 kDa)  
414 were acquired from Biochempeg Scientific Inc. *N*-(3-aminopropyl)methacrylamide hydrochloride  
415 (APMA) and *N,N'*-bis(acryloyl)cystamine (BACA) were purchased from Sigma-Aldrich. Peptides, Cys-  
416 TAT (CYGRKKRRQRRR) and RVG-Cys (YTIWMPENPRPGTPCDIFTNSRGKRASNGC) were  
417 synthesized by Genscript. Nuclear localization signal (NLS)-tagged *Streptococcus pyogenes* Cas9  
418 nuclease (sNLS-SpCas9-sNLS) was obtained from Aldevron. *In vitro* transcribed single guide RNAs  
419 (sgRNAs) were purchased from Integrated DNA Technologies, Inc., or Synthego. The sgRNAs used in  
420 this experiment include the Ai14 sgRNA (protospacer 5' - AAGTAAAACCTCTACAAATG-3') and a  
421 non-targeting sgRNA (Alt-R CRISPR-Cas9 Negative Control crRNA #1, Integrated DNA Technologies,  
422 Inc., USA). GFP-targeting sgRNAs (GFP protospacer: 5'-GCACGGGCAGCTTGCCGG-3') were  
423 purchased from Synthego (i.e., sgRNA 1) and Integrated DNA Technologies (i.e., sgRNA 2).

424

### 425 *Synthesis of peptide conjugated Ac-PEG (Ac-PEG-CPP and Ac-PEG-RVG)*

426 Ac-PEG-CPP and Ac-PEG-RVG were synthesized via a Michael addition reaction between Ac-PEG-Mal  
427 and corresponding peptides with cysteine terminals. Typically, 10  $\mu$ mol of peptide was mixed with Ac-  
428 PEG-Mal (24 mg, 1.2  $\mu$ mol) in DI water containing 5 mM TCEP, with the pH of the mixture adjusted to  
429 7. The reaction was carried out under a nitrogen atmosphere at room temperature. After 12 h, the Ac-  
430 PEG-peptide was purified by dialysis against DI water for 48 h (MWCO 2kDa) and lyophilized to obtain  
431 the products in dry powder form. The <sup>1</sup>H-NMR spectrum of Ac-PEG-CPP and Ac-PEG-RVG were shown  
432 in Supp. Figs. 4 and 5, respectively (D<sub>2</sub>O, 400 MHz).

433

### 434 *Preparation of Cas9-sgRNA ribonucleoprotein (RNP)*

435 The sNLS-Cas9-sNLS protein was combined with sgRNA at a 1:1 molar ratio. The mixture was allowed  
436 to complex for 5 min on ice with gentle mixing. The as-prepared RNP was used freshly, without further  
437 purification.

438

### 439 *Preparation of NCs*

440 NCs were prepared as previously reported with minor modifications<sup>32</sup>. Prior to NC synthesis, pH = 8.5  
441 sodium bicarbonate buffer (5 mM) was freshly prepared and degassed using the freeze-pump-thaw  
442 method for three cycles. Monomers, AA, APMA, VI and Ac-PEG were accurately weighed and dissolved  
443 in degassed sodium bicarbonate buffer (10 mg/ml). The crosslinker, BACA, was dissolved in DMSO (2  
444 mg/ml). The free radical initiators, APS and TEMED were accurately weighed and dissolved in degassed

445 sodium bicarbonate buffer (10 mg/ml). The Cas9 RNP was placed in a Schlenk flask and diluted to  
446 0.12 mg/ml in sodium bicarbonate buffer in a nitrogen atmosphere. Monomer solutions were added into  
447 the above solution under vigorous stirring in the order of AA, APMA and VI at 5 min intervals. In each  
448 5 min interval, the solution was degassed by vacuum pump for 3 min and refluxed with nitrogen. After  
449 another 5 min, the crosslinker, BACA, was added, followed by the addition of APS. The mixture was  
450 degassed for 5 min, and the polymerization reaction was immediately initiated by the addition of  
451 TEMED. The *in situ* free radical polymerization was carried out under a nitrogen atmosphere for 50 min.  
452 Thereafter, Ac-PEG was added. The solution was degassed by a vacuum pump, and the reaction was  
453 resumed for another 20 min to allow for NC surface PEGylation. The as-prepared NC was purified and  
454 concentrated by Ultrafiltration using Amicon® Ultra centrifugal filters (MilliporeSigma, MWCO 100  
455 kDa) and redispersed in NC storage buffer (20 mM HEPES-NaOH pH 7.5, 150 mM NaCl, 10 %  
456 glycerol). The molar ratio of AA/APMA/VI/BACA/Ac-PEG/RNP used for the optimal formulation was  
457 927/927/244/231/64/1. The weight ratio of RNP/APS/TEMED was kept at 1/0.5/0.5, corresponding to a  
458 molar ratio of approximately 1/350/700. NC-CPP and NC-RVG were prepared following a similar  
459 protocol as described above with the molar ratio of AA/APMA/VI/BACA/Ac-mPEG/Ac-PEG-CPP(or  
460 RVG) at 927/927/244/231/32/32.

461

#### 462 *Characterization*

463 The sizes and zeta-potentials of NCs were studied by dynamic light scattering (ZetaSizer Nano ZS90).  
464 NCs were redispersed in DI water, and the pH was adjusted to 7.4 by 1 M NaOH, prior to DLS and zeta  
465 potential measurements. The NC concentrations for DLS and zeta potential were 0.1 mg/ml and 0.05  
466 mg/ml, respectively. The morphologies of NCs were also characterized by transmission electron  
467 microscopy (TEM, FEI Tecnai 12, 120 keV).

468

#### 469 *Cell culture and NC storage studies*

470 GFP-expressing human embryonic kidney cells (i.e., GFP-HEK cells, GenTarget Inc.) were used as an  
471 RNP delivery cell model. GFP-HEK cells were cultured with DMEM medium (Gibco, USA) added with  
472 10% (v/v) fetal bovine serum (FBS, Gibco, USA) and 1% (v/v) penicillin–streptomycin (Gibco, USA).  
473 Cells were cultured in an incubator (Thermo Fisher, USA) at 37°C with 5% carbon dioxide at 100%  
474 humidity.

475 For the storage test, NCs with GFP-targeting sgRNAs (GFP protospacer: 5'-  
476 GCACGGGCAGCTTGCCGG-3') purchased from Synthego (i.e., sgRNA 1) and Integrated DNA  
477 Technologies (i.e., sgRNA 2) were prepared and redispersed in NC storage buffer with a RNP  
478 concentration of 20 µM. The NCs were then aliquoted and stored at different temperatures (i.e., 4°C, -20  
479 and -80°C) in a storage buffer (20 mM HEPES-NaOH pH 7.5, 150 mM NaCl, 10 % glycerol). The RNP  
480 NCs were flash-frozen in liquid nitrogen prior to storage at -20 °C or -80 °C. GFP-HEK cells were seeded  
481 at a density of 5,000 cells per well onto a 96-well plate 24 h prior to NC treatments. Cells were treated  
482 with NCs with a RNP dose of 150 ng/well (or an equivalent Cas9 protein dose of 125 ng/well). After 96  
483 h, cells were detached from the well plates with 0.25% trypsin-EDTA, spun down and resuspended in 500  
484 µl phosphate buffered saline (PBS). The editing efficiency was assayed using flow cytometry by  
485 quantifying the percentage of GFP-negative cells.

486

#### 487 *Intracerebral Injections*

488 Ai14 mice (The Jackson Laboratory (JAX), STOCK# 7914) were used to assay the gene editing  
489 efficiency in the brain (Fig. 2a). Experiments were conducted at both UW-Madison and JAX as part of  
490 the NIH Somatic Cell Genome Editing Consortium (SCGE) effort to show repeatability of findings. See  
491 Supp. Table 1 for details on subjects, assigned treatments, and tissue used for analysis.

492

493 All animal treatments and procedures were approved by either the University of Wisconsin–Madison or  
494 JAX Animal Care and Use Committee as appropriate. Mice were examined and determined to be in good  
495 health the day of injection. Mice were anaesthetized by either intraperitoneal injection of a ketamine (120

496 mg/kg), xylazine (10 mg/kg), and acepromazine (2 mg/kg) cocktail (UW-Madison) or isoflurane gas  
497 (inhalation to effect, typically 1-3%) (JAX). Stereotactic brain injections were performed using a  
498 Stoelting stereotaxic frame equipped with a Stoelting Quintessential Stereotax Injector (QSI). Solutions  
499 were intracerebrally delivered at a rate of 0.2  $\mu$ l/minute. After the injection was completed, the needle  
500 remained in place for up to 5 minutes, then the surgical field was irrigated with sterile saline and the skin  
501 layers closed with surgical glue.

502  
503 For the UW-Madison methods development animal cohort, the right and/or left striatum was targeted at  
504 coordinates of AP +0.74 mm, ML  $\pm$ 1.74 mm, DV -3.37 mm using a 10  $\mu$ l Hamilton syringe and 32-gauge  
505 1 inch Hamilton small hub RN needle. The solutions delivered were 1.5  $\mu$ l of NC-No Ligand or NC-CPP  
506 with RNP carrying guide targeting either Ai14 or a non-targeting guide at 20  $\mu$ M RNP suspended in PBS  
507 or 1  $\mu$ l of storage buffer (Supp. Table 1). Brain hemispheres of mice injected with NCs with RNP  
508 containing Ai14 targeting guide in the striatal target area were imaged for neuron editing analysis (NC-  
509 CPP, n = 3 hemispheres; NC-No Ligand, n = 4 hemispheres). In addition, uninjected mouse brain  
510 hemispheres (n = 3) were also imaged to assess host reaction to the NCs (Supp. Table 1).

511  
512 For JAX animal cohorts, the right striatum was targeted at coordinates AP +1.2 mm, ML $\pm$  1.6 mm, DV -  
513 3.37) (Fig. 2b; Supp. Table 1), using a similar syringe set up. The solutions delivered were 1  $\mu$ l of NC-No  
514 Ligand (n = 6 hemispheres), NC-RVG (n = 6 hemispheres), or NC-CPP (n = 6 hemispheres) carrying  
515 guide targeting Ai14 at 20  $\mu$ M RNP suspended in a storage buffer. The same volume of NCs carrying the  
516 non-targeting guide was injected into the contralateral hemisphere.

#### 517 518 *Necropsy and tissue processing*

519 For all animals, brain tissue was collected two weeks after intracerebral injection. At UW-Madison, mice  
520 were deeply anesthetized with a combination of ketamine (120 mg/kg) and xylazine (10 mg/kg) and  
521 transcardially perfused with heparinized saline. Brains were retrieved, post-fixed for 24 hours in 4% PFA,  
522 and cryoprotected in graded sucrose. At JAX, mice were euthanized via CO<sub>2</sub> asphyxiation, followed  
523 immediately by transcardiac perfusion with heparinized PBS. Brains were collected, post-fixed for 48  
524 hours in 4% PFA, and cryoprotected in 30% sucrose/PBS at 4°C for 48 hours. All brains were cut frozen  
525 in 40  $\mu$ m coronal sections on a sliding microtome and stored at -20°C in cryoprotectant solution until  
526 staining. For UW-Madison animals, while cutting, the left hemisphere of each coronal slice was identified  
527 by making two small holes in the cerebral cortex. The cryoprotectant solution at UW-Madison consisted  
528 of 1000 ml 1X PBS (pH 7.4), 600 g sucrose, 600 ml ethylene glycol and at JAX of 350 ml 0.1 M PB  
529 solution (pH 7.35), 150 ml ethylene glycol, 100  $\mu$ g sodium azide, 150 g sucrose.

#### 530 531 *Anatomical Evaluation*

532 Serial coronal brain sections spaced 240  $\mu$ m apart from three JAX injected NC-No Ligand group animals  
533 and one animal with an uninjected brain hemisphere were stained for HE and blindly evaluated by a  
534 board-certified veterinary pathologist. The sections were assessed for histological changes such as  
535 presence and severity of inflammation or atrophy. Striatal sections from one animal with an uninjected  
536 brain hemisphere were stained for Nissl to collect an image illustrating normal murine striatal anatomy  
537 (Fig. 2c).

#### 538 539 *Immunohistochemistry*

540 All immunolabeling was performed using one sixth serial brain sections spaced 240  $\mu$ m apart from each  
541 animal to sample the entire rostrocaudal span of the striatum. After three 10-minute washes in Tris  
542 buffered saline (TBS) plus 0.05% TritonX-100, background staining was blocked with a 2 hour  
543 incubation in a (TBS) solution containing 5% normal serum, 2% bovine serum albumin, and 0.05%  
544 Triton X-100. The slices were incubated with primary antibody (Supp. Table 2) for 24 hours at room  
545 temperature, washed 3 times in dilution media, and then incubated for 2 hours at room temperature with  
546 secondary antibody (Supp. Table 3). After three 10-minute washes in PBS, the tissue was counterstained

547 with DAPI, mounted onto slides, allowed to dry, and coverslipped with Fluor Gel. Immunostaining of  
548 tissue sections from animals in different treatment groups was performed in parallel and included negative  
549 and positive controls. Positive controls for tdTomato consisted of tissue from an Ai9 mouse (JAX 7909)  
550 crossed with an Myf-Cre expressing mouse (JAX, 7893, tissue provided by Murray Lab). Negative  
551 controls were performed by omitting primary antibodies.

#### 552 553 *Image acquisition*

554 Image acquisition performed at UW-Madison utilized a Nikon A1R confocal microscope with 405, 488,  
555 561, and 640 wavelength lasers using NIS Elements version 5.20.02. Detectors for the 488 and 561 lasers  
556 are high sensitivity GaAsP PMTs, while the 405 and 640 lasers use HS PMTs. Whole coronal brain slice  
557 images were acquired using the 4x objective (Plan Apo, N.A. = 0.2, Nikon) and using XY stitching with  
558 30-35% overlap. Images used for analysis of neuronal editing efficiency/edited area (methods  
559 development cohort), types of edited neurons, or glial response were acquired at UW-Madison using the  
560 20x objective (Plan Apo VC, N.A. = 0.75, Nikon) with XY stitching with 30-35% overlap in either a  
561 single focal plane (glial response) or in 3 focal planes each 5  $\mu\text{m}$  apart covering a total of 10  $\mu\text{m}$   
562 (neuronal editing efficiency/editing area and types of edited neurons). High magnification images to show  
563 details of colabeling were acquired at 40x (Plan Fluor, N.A. = 0.75, Nikon) with multiple focal planes.  
564 The size of each frame was 1024 x 1024 pixels, and the intensity of the signal in each pixel was recorded  
565 at 12-bits for each channel. Images taken in multiple focal planes were processed as maximum intensity  
566 projections for figures and analysis.

567  
568 Image acquisition performed at JAX used a Leica DMi8 widefield microscope (to evaluate genome-edited  
569 edited area size) and a Leica Sp8-AOBS confocal microscope equipped with 405, 458, 488, 514, 561,  
570 594, and 633 nm wavelength lasers and the LASX software (to evaluate neuronal editing efficiency). The  
571 Leica Sp8-AOBS confocal microscope is equipped with UV/DAPI (A), FITC/AF-488/GFP (I3),  
572 Tritc/Rhod/DsRed (N2.1) filters. PMT detectors are fed by an acousto-optical beam splitter (AOBS) and a  
573 spectral detector (prism). Images were acquired using the 20x objective (NA0.75 GLYC WD = 0.66 mm  
574 CORR) with XY stitching with 10% overlap in 3 focal planes each 5  $\mu\text{m}$  apart covering a total of 10  $\mu\text{m}$ .  
575 The size of each frame was 1024-2079 x 1024-3947 and the intensity in each pixel was recorded at 16-  
576 bits for each channel.

577  
578 During the preparation of images for figures for the manuscript, any adjustments to image brightness,  
579 such as adjusting of LUTs of immunofluorescent images, were applied to the entire image. Images with  
580 adjustments to individual channel LUTs have this noted in figure legends with detailed information in  
581 Supp. Table 4.

#### 582 583 *Image analysis*

584 All analysis of neuronal editing efficiency and genome-edited area size, for both the UW-Madison and  
585 JAX injected animals, was performed using tdTomato/NeuN/GFAP triple-immunolabeled tissue  
586 counterstained with DAPI (Supp. Table 1). ROIs were drawn in maximum intensity projection images  
587 around areas of tdTomato signal in which a group of at least 5 cells were tdTomato+ and within 135  $\mu\text{m}$   
588 of each other. Neuronal editing efficiency was calculated for the three largest ROIs for each animal, as the  
589 percentage of NeuN+ cells that were also tdTomato+.

590  
591 In the UW-Madison injected animals, ROIs were drawn in NIS Elements version 5.30.02 using the Draw  
592 Polygonal ROI function in the red (tdTomato) channel of the maximum intensity projection image, and  
593 the size (area in  $\mu\text{m}^2$ ) was exported for each ROI. Using NIS Elements, the total number of NeuN+ cells  
594 inside the ROI was calculated using the Binary Function followed by manual correction. A threshold was  
595 defined in the NeuN channel with the lower range set to exclude background, 3x smooth, 6x clean, 1x  
596 separate, and size selection > 5  $\mu\text{m}$ . The automated count was then manually edited based on NeuN  
597 immunolabeling to split groups of cells counted as a single cell and to exclude NeuN+ cells with less than



598 50% of the cell soma inside the ROI. Genome-edited neurons were defined as NeuN+ and tdTomato+ and  
599 were manually selected in NIS Elements and counted.

600

601 In JAX injected animals, polygonal ROIs were drawn in FIJI following duplication of the tdTomato  
602 channel and conversion to a binary, and the size (area in  $\mu\text{m}^2$ ) was exported for each ROI and recorded  
603 (Fig. 2). To count the total number of neurons, the NeuN channel was duplicated and converted to a  
604 binary. Images were then processed using the StarDist2D plugin with fluorescent default settings. The  
605 threshold of the resulting Label Image (V) was adjusted so that all cells were visible, and the image was  
606 processed using the watershed tool to separate touching objects. The ROI was then copied from the  
607 tdTomato image and NeuN+ cells counted using the Analyze Particle function with size 40-infinity and  
608 circularity 0-1 (Fig. 2). Automated NeuN counts using this method significantly correlated with manual  
609 counts performed in a subset of images ( $\rho = 0.897$ ,  $p < 0.0001$ ; Supp. Table 5). Genome-edited  
610 NeuN+/tdTomato+ neurons within each ROI were manually selected and counted using the multipoint  
611 tool in FIJI (Fig. 2).

612

613 Assessing the types of neurons that were genome-edited was performed with tdTomato/DARPP32/ChAT  
614 or tdTomato/Parvalbumin/Calretinin triple-immunolabeled tissue counterstained with DAPI (n=3 per NC  
615 treatment group; Supp. Table 1). Neuron counts were performed using the Taxonomy function in NIS  
616 Elements version 5.30.02 in  $800 \mu\text{m} \times 1200 \mu\text{m}$  ROIs in 2-4 coronal tissue sections per animal.

617

618 For analysis of glial response, imaging was performed on tdTomato/GFAP/Iba1 triple-immunolabeled  
619 tissue counterstained with DAPI (Supp. Table 1). Mean fluorescence intensity of 2 coronal tissue sections  
620 were evaluated per animal to compare uninjected, NC-No Ligand non-targeting sgRNA, and NC-No  
621 Ligand Ai14 sgRNA groups (n=3 hemispheres per group). In each section, data was averaged from two  
622 nonoverlapping ROIs with ROI size of  $500 \mu\text{m} \times 500 \mu\text{m}$ . ROIs were placed around the areas with the  
623 highest GFAP or Iba1 immunolabeling in the target area.

624

### 625 *Statistics*

626 All statistical analyses were performed in GraphPad Prism v9. Comparisons between groups were made  
627 using the Kruskal-Wallis test (test statistic =  $H$ ) with Dunn's test for multiple comparisons for tests  
628 involving three or more groups (JAX animals editing efficiency treatment group comparison, JAX  
629 animals edited area treatment group comparison, edited neuron types treatment group comparison, Iba1  
630 and GFAP mean fluorescence intensity). For multiple comparisons tests involving two groups (UW-  
631 Madison animals editing efficiency treatment group comparison and UW-Madison animals edited area  
632 treatment group comparison) the Mann-Whitney test (test statistic =  $U$ ) was performed and reported. *In*  
633 *vivo* animal averages are presented in the text as median  $\pm$  interquartile to be consistent with the  
634 nonparametric statistical tests performed due to multiple datasets exhibiting non-normal distributions.  
635 Spearman correlation was used to test the relationship between automated vs. manual NeuN counts. All  $p$   
636 values reported are two tailed, and a  $p$  value  $< 0.05$  is considered statistically significant. Effect sizes are  
637 given for statistically significant  $p$  values. Effect size for Spearman correlation is reported as the test  
638 statistic  $\rho$ . Effect sizes for Mann-Whitney are reported as  $r = (Z/(\text{sqrt}(n)))$  where  $r$  is the effect size,  $Z$  is  
639 the standardized test statistic, and  $n$  is the total number of observations.

640 **ACKNOWLEDGEMENTS**

641

642 We are grateful for the technical support provided by Kat Jones and Pankaj Dubey. We thank the highly  
643 trained animal care technicians, surgeons, and colony managers at JAX for their hard work and dedication  
644 with special thanks to Randy Walls, Amy Leighton, and Jonathan Newell. Additional thanks to Lawrence  
645 Bechtel, Seth Hannigan and Jeff Duryea, Jr. at the JAX Small Animal Testing Center, for their talents in  
646 collecting the data associated with this and similar SCGE consortium validation projects. This work was  
647 supported by the NIH Common Fund and National Institutes of Health Office of the Director U54  
648 OD026635 (S.A.M. and C.M.L), the WIMR optical imaging core (1S10OD025040-01), NIH 1-UG3-NS-  
649 111688-01 (S.R., K.S., J.L., M.E.E., S.G), and NIH UH3 grant # 4-UH3-NS111688 (S.R., K.S., J.L.,  
650 M.E.E., S.G).

651

652

653 **DATA SHARING PLAN**

654

655 The datasets generated during and/or analyzed during the current study are available from the  
656 corresponding authors on reasonable request.

657 **REFERENCES**

- 658
- 659 1 Sharma, G., Sharma, A. R., Bhattacharya, M., Lee, S.-S. & Chakraborty, C. CRISPR-Cas9: A  
660 Preclinical and Clinical Perspective for the Treatment of Human Diseases. *Molecular Therapy* **29**,  
661 571-586, doi:10.1016/j.ymthe.2020.09.028 (2021).
- 662 2 Saha, K. *et al.* The NIH Somatic Cell Genome Editing program. *Nature* **592**, 195-204,  
663 doi:10.1038/s41586-021-03191-1 (2021).
- 664 3 Stadtmauer, E. A. *et al.* CRISPR-engineered T cells in patients with refractory cancer. *Science* **367**,  
665 eaba7365, doi:10.1126/science.aba7365 (2020).
- 666 4 Gillmore, J. D. *et al.* CRISPR-Cas9 In Vivo Gene Editing for Transthyretin Amyloidosis. *The New*  
667 *England journal of medicine* **385**, 493-502, doi:10.1056/NEJMoa2107454 (2021).
- 668 5 Maeder, M. L. *et al.* Development of a gene-editing approach to restore vision loss in Leber  
669 congenital amaurosis type 10. *Nature medicine* **25**, 229-233, doi:10.1038/s41591-018-0327-9  
670 (2019).
- 671 6 Doudna, J. A. Genomic engineering and the future of medicine. *Jama* **313**, 791-792,  
672 doi:10.1001/jama.2015.287 (2015).
- 673 7 Heidenreich, M. & Zhang, F. Applications of CRISPR-Cas systems in neuroscience. *Nature*  
674 *reviews. Neuroscience* **17**, 36-44, doi:10.1038/nrn.2015.2 (2016).
- 675 8 Bourasset, F., Auvity, S., Thorne, R. G. & Scherrmann, J. M. Brain Distribution of Drugs: Brain  
676 Morphology, Delivery Routes, and Species Differences. *Handb Exp Pharmacol*,  
677 doi:10.1007/164\_2020\_402 (2021).
- 678 9 Pardridge, W. M. Blood-Brain Barrier and Delivery of Protein and Gene Therapeutics to Brain.  
679 *Frontiers in aging neuroscience* **11**, doi:10.3389/fnagi.2019.00373 (2020).
- 680 10 Kimura, S. & Harashima, H. Current Status and Challenges Associated with CNS-Targeted Gene  
681 Delivery across the BBB. *Pharmaceutics* **12**, doi:10.3390/pharmaceutics12121216 (2020).
- 682 11 Peviani, M. *et al.* Biodegradable polymeric nanoparticles administered in the cerebrospinal fluid:  
683 Brain biodistribution, preferential internalization in microglia and implications for cell-selective  
684 drug release. *Biomaterials* **209**, 25-40, doi:10.1016/j.biomaterials.2019.04.012 (2019).
- 685 12 MacKay, J. A., Deen, D. F. & Szoka, F. C., Jr. Distribution in brain of liposomes after convection  
686 enhanced delivery; modulation by particle charge, particle diameter, and presence of steric  
687 coating. *Brain research* **1035**, 139-153, doi:10.1016/j.brainres.2004.12.007 (2005).
- 688 13 Wolak, D. J. & Thorne, R. G. Diffusion of Macromolecules in the Brain: Implications for Drug  
689 Delivery. *Molecular Pharmaceutics* **10**, 1492-1504, doi:10.1021/mp300495e (2013).
- 690 14 Colasante, G. *et al.* In vivo CRISPRa decreases seizures and rescues cognitive deficits in a rodent  
691 model of epilepsy. *Brain* **143**, 891-905, doi:10.1093/brain/awaa045 (2020).
- 692 15 Zuckermann, M. *et al.* Somatic CRISPR/Cas9-mediated tumour suppressor disruption enables  
693 versatile brain tumour modelling. *Nature communications* **6**, 7391, doi:10.1038/ncomms8391  
694 (2015).
- 695 16 Hana, S. *et al.* Highly efficient neuronal gene knockout in vivo by CRISPR-Cas9 via neonatal  
696 intracerebroventricular injection of AAV in mice. *Gene Therapy* **28**, 646-658,  
697 doi:10.1038/s41434-021-00224-2 (2021).
- 698 17 Torregrosa, T. *et al.* Use of CRISPR/Cas9-mediated disruption of CNS cell type genes to profile  
699 transduction of AAV by neonatal intracerebroventricular delivery in mice. *Gene Therapy* **28**, 456-  
700 468, doi:10.1038/s41434-021-00223-3 (2021).
- 701 18 Coniot, J., Talebian, S., Simões, S., Ferreira, L. & Conde, J. Revisiting gene delivery to the brain:  
702 silencing and editing. *Biomater Sci* **9**, 1065-1087, doi:10.1039/d0bm01278e (2021).
- 703 19 Duan, L. *et al.* Nanoparticle Delivery of CRISPR/Cas9 for Genome Editing. *Frontiers in Genetics*  
704 **12**, doi:10.3389/fgene.2021.673286 (2021).

- 705 20 Bulcha, J. T., Wang, Y., Ma, H., Tai, P. W. L. & Gao, G. Viral vector platforms within the gene  
706 therapy landscape. *Signal transduction and targeted therapy* **6**, 53, doi:10.1038/s41392-021-  
707 00487-6 (2021).
- 708 21 Hanlon, K. S. *et al.* High levels of AAV vector integration into CRISPR-induced DNA breaks. *Nature*  
709 *communications* **10**, 4439, doi:10.1038/s41467-019-12449-2 (2019).
- 710 22 Li, A. *et al.* A Self-Deleting AAV-CRISPR System for In Vivo Genome Editing. *Mol Ther Methods*  
711 *Clin Dev* **12**, 111-122, doi:10.1016/j.omtm.2018.11.009 (2019).
- 712 23 Li, L., Hu, S. & Chen, X. Non-viral delivery systems for CRISPR/Cas9-based genome editing:  
713 Challenges and opportunities. *Biomaterials* **171**, 207-218,  
714 doi:10.1016/j.biomaterials.2018.04.031 (2018).
- 715 24 Chew, W. L. *et al.* A multifunctional AAV-CRISPR-Cas9 and its host response. *Nature Methods*  
716 **13**, 868-874, doi:10.1038/nmeth.3993 (2016).
- 717 25 Weber, T. Anti-AAV Antibodies in AAV Gene Therapy: Current Challenges and Possible Solutions.  
718 *Frontiers in immunology* **12**, doi:10.3389/fimmu.2021.658399 (2021).
- 719 26 Kim, S., Kim, D., Cho, S. W., Kim, J. & Kim, J. S. Highly efficient RNA-guided genome editing in  
720 human cells via delivery of purified Cas9 ribonucleoproteins. *Genome research* **24**, 1012-1019,  
721 doi:10.1101/gr.171322.113 (2014).
- 722 27 Liang, X. *et al.* Rapid and highly efficient mammalian cell engineering via Cas9 protein  
723 transfection. *Journal of biotechnology* **208**, 44-53,  
724 doi:<https://doi.org/10.1016/j.jbiotec.2015.04.024> (2015).
- 725 28 Foss, D. V. & Wilson, R. C. Emerging Strategies for Genome Editing in the Brain. *Trends in*  
726 *Molecular Medicine* **24**, 822-824, doi:10.1016/j.molmed.2018.07.008 (2018).
- 727 29 Staahl, B. T. *et al.* Efficient genome editing in the mouse brain by local delivery of engineered  
728 Cas9 ribonucleoprotein complexes. *Nat Biotechnol* **35**, 431-434, doi:10.1038/nbt.3806 (2017).
- 729 30 Lee, B. *et al.* Nanoparticle delivery of CRISPR into the brain rescues a mouse model of fragile X  
730 syndrome from exaggerated repetitive behaviours. *Nature biomedical engineering* **2**, 497-507,  
731 doi:10.1038/s41551-018-0252-8 (2018).
- 732 31 Park, H. *et al.* In vivo neuronal gene editing via CRISPR-Cas9 amphiphilic nanocomplexes  
733 alleviates deficits in mouse models of Alzheimer's disease. *Nature neuroscience* **22**, 524-528,  
734 doi:10.1038/s41593-019-0352-0 (2019).
- 735 32 Chen, G. *et al.* A biodegradable nanocapsule delivers a Cas9 ribonucleoprotein complex for in  
736 vivo genome editing. *Nat Nanotechnol* **14**, 974-980, doi:10.1038/s41565-019-0539-2 (2019).
- 737 33 Madisen, L. *et al.* A robust and high-throughput Cre reporting and characterization system for  
738 the whole mouse brain. *Nature neuroscience* **13**, 133-140, doi:10.1038/nn.2467 (2010).
- 739 34 Arlotta, P., Molyneaux, B. J., Jabaudon, D., Yoshida, Y. & Macklis, J. D. *Ctip2* Controls  
740 the Differentiation of Medium Spiny Neurons and the Establishment of the Cellular Architecture  
741 of the Striatum. *The Journal of Neuroscience* **28**, 622-632, doi:10.1523/jneurosci.2986-07.2008  
742 (2008).
- 743 35 Lemos, J. C., Shin, J. H. & Alvarez, V. A. Striatal Cholinergic Interneurons Are a Novel Target of  
744 Corticotropin Releasing Factor. *The Journal of Neuroscience* **39**, 5647-5661,  
745 doi:10.1523/jneurosci.0479-19.2019 (2019).
- 746 36 Tepper, J., Tecuapetla, F., Koos, T. & Ibanez-Sandoval, O. Heterogeneity and Diversity of Striatal  
747 GABAergic Interneurons. *Frontiers in Neuroanatomy* **4**, doi:10.3389/fnana.2010.00150 (2010).
- 748 37 Thorne, R. G. & Nicholson, C. In vivo diffusion analysis with quantum dots and dextrans predicts  
749 the width of brain extracellular space. *Proceedings of the National Academy of Sciences* **103**,  
750 5567-5572 (2006).
- 751 38 Nance, E. *et al.* Brain-penetrating nanoparticles improve paclitaxel efficacy in malignant glioma  
752 following local administration. *ACS nano* **8**, 10655-10664 (2014).

- 753 39 Vermilyea, S. C. *et al.* Real-Time Intraoperative MRI Intracerebral Delivery of Induced Pluripotent  
754 Stem Cell-Derived Neurons. *Cell transplantation* **26**, 613-624, doi:10.3727/096368916X692979  
755 (2017).
- 756 40 Mehta, A. M., Sonabend, A. M. & Bruce, J. N. Convection-Enhanced Delivery.  
757 *Neurotherapeutics : the journal of the American Society for Experimental NeuroTherapeutics* **14**,  
758 358-371, doi:10.1007/s13311-017-0520-4 (2017).
- 759 41 Nance, E. A. *et al.* A dense poly(ethylene glycol) coating improves penetration of large polymeric  
760 nanoparticles within brain tissue. *Sci Transl Med* **4**, 149ra119,  
761 doi:10.1126/scitranslmed.3003594 (2012).
- 762 42 Swiech, L. *et al.* In vivo interrogation of gene function in the mammalian brain using CRISPR-  
763 Cas9. *Nat Biotechnol* **33**, 102-106, doi:10.1038/nbt.3055 (2015).
- 764 43 Platt, Randall J. *et al.* CRISPR-Cas9 Knockin Mice for Genome Editing and Cancer Modeling. *Cell*  
765 **159**, 440-455, doi:<https://doi.org/10.1016/j.cell.2014.09.014> (2014).
- 766 44 Yamaguchi, H., Hopf, F. W., Li, S. B. & de Lecea, L. In vivo cell type-specific CRISPR knockdown of  
767 dopamine beta hydroxylase reduces locus coeruleus evoked wakefulness. *Nature*  
768 *communications* **9**, 5211, doi:10.1038/s41467-018-07566-3 (2018).
- 769 45 Nishiyama, J., Mikuni, T. & Yasuda, R. Virus-Mediated Genome Editing via Homology-Directed  
770 Repair in Mitotic and Postmitotic Cells in Mammalian Brain. *Neuron* **96**, 755-768.e755,  
771 doi:10.1016/j.neuron.2017.10.004 (2017).
- 772 46 Sun, H. *et al.* Development of a CRISPR-SaCas9 system for projection- and function-specific gene  
773 editing in the rat brain. *Science Advances* **6**, eaay6687, doi:doi:10.1126/sciadv.aay6687 (2020).
- 774 47 Jing, L. *et al.* Accumulation of Endogenous Mutant Huntingtin in Astrocytes Exacerbates  
775 Neuropathology of Huntington Disease in Mice. *Molecular neurobiology* **58**, 5112-5126,  
776 doi:10.1007/s12035-021-02451-5 (2021).
- 777 48 Yang, S. *et al.* CRISPR/Cas9-mediated gene editing ameliorates neurotoxicity in mouse model of  
778 Huntington's disease. *The Journal of clinical investigation* **127**, 2719-2724, doi:10.1172/JCI92087  
779 (2017).
- 780 49 Sun, J. *et al.* CRISPR/Cas9 editing of APP C-terminus attenuates  $\beta$ -cleavage and promotes  $\alpha$ -  
781 cleavage. *Nature communications* **10**, 53, doi:10.1038/s41467-018-07971-8 (2019).
- 782 50 Lai, T. T. *et al.* Temporal Evolution of Inflammation and Neurodegeneration With Alpha-  
783 Synuclein Propagation in Parkinson's Disease Mouse Model. *Frontiers in Integrative*  
784 *Neuroscience* **15**, doi:10.3389/fnint.2021.715190 (2021).

785
